# Supplementary material
Source: PubMed Central journal article supplement (PMC2812310)
Supplement: supp_84_3_1387__1.pdf [file supp_84_3_1387__1.pdf]

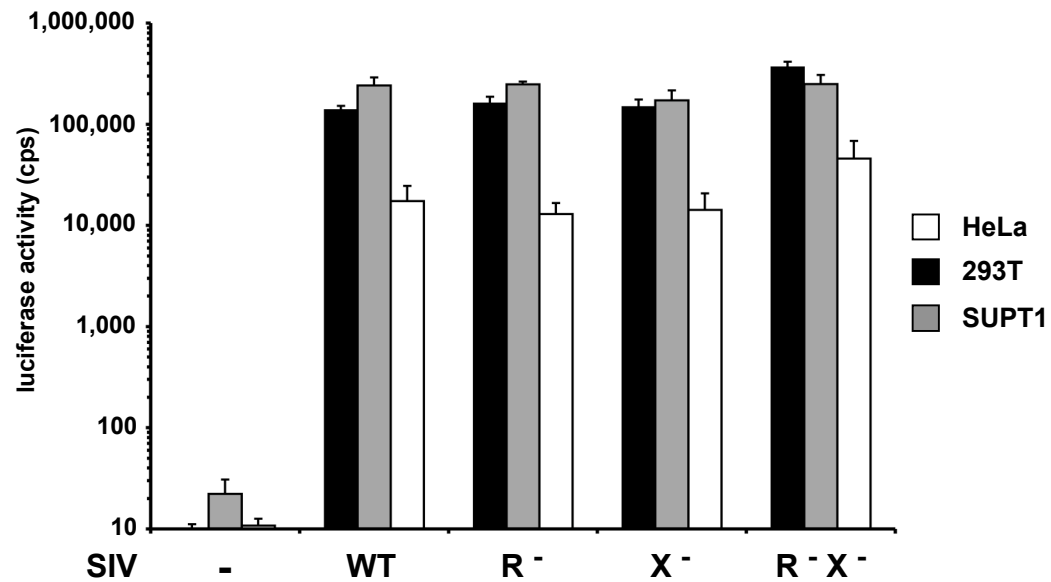

**FIG. S1. Vpx has no effect on SIVmac infection of standard cell lines.** HeLa, 293T and SUPT1 cells were infected with SIVmac luciferase reporter viruses. Luciferase activity was measured 3 days postinfection. The data are presented as the average of triplicate infections with error bars indicating the standard deviation. One representative experiment of two is shown.

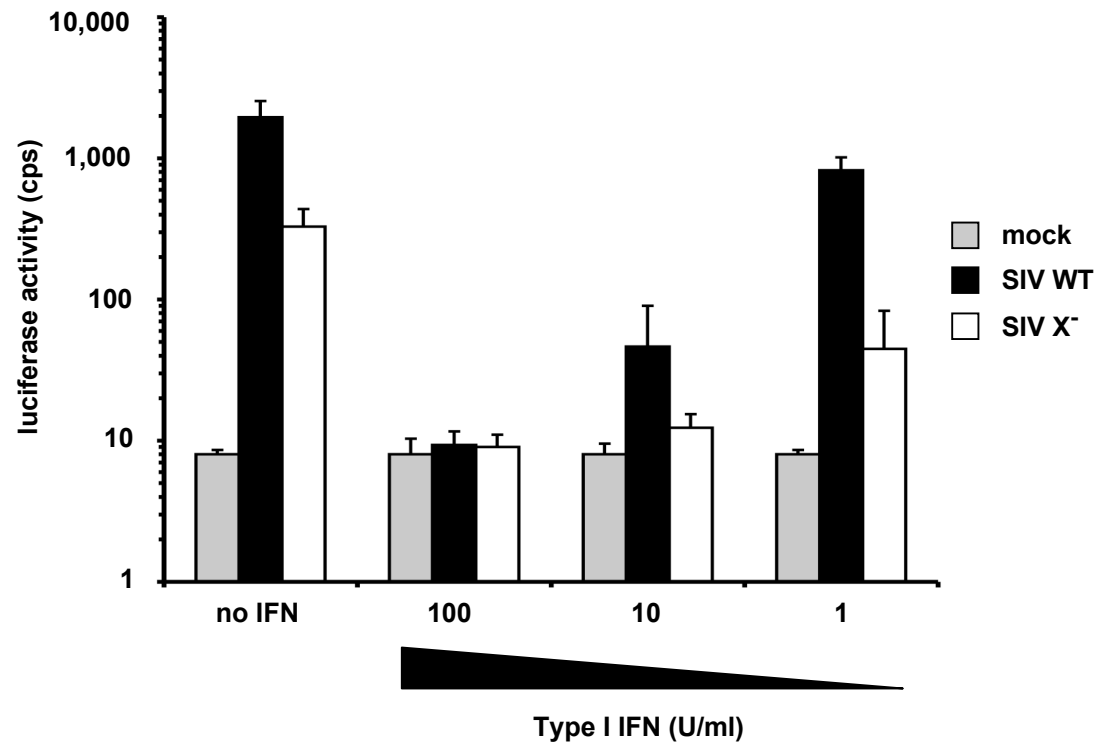

**FIG. S2. The effect of Vpx on SIVmac infection is not dramatically increased in type I IFN-induced MDM.** MDM were induced for 14 h with increasing concentrations of type I IFN and then infected with wild-type (SIV WT) or  $\Delta vpx$  (SIV X<sup>-</sup>) SIV luciferase reporter virus. One set of wells was left uninfected (mock) to control for background. Luciferase activity was measured 4 days postinfection. The results are representative of two independent experiments with MDM from different donors.

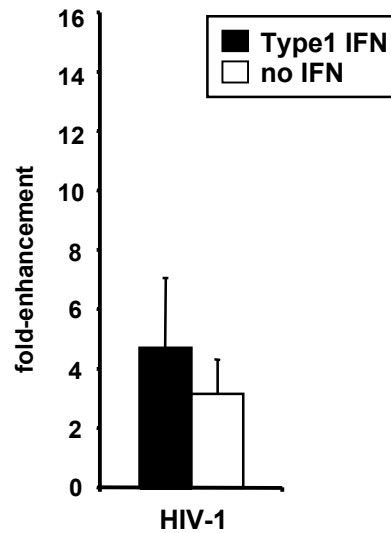

**FIG. S3. Vpx does not help HIV-1 to overcome an IFN-induced antiviral response in THP-1.** Differentiated THP-1 cells were induced with 100 U/ml type I IFN overnight. The cells were then incubated with wild-type or  $\Delta vpx$  VLP and after 2 h, infected with HIV-1 reporter virus. Luciferase activity was measured 3 days postinfection. The average of 4 independent experiments is shown as fold enhancement of HIV-1 infection of wild-type VLP relative to  $\Delta vpx$  VLP treated cells.
